# Supplementary material for: Light modulation based on the enhanced Kerr effect in molybdenum disulfide nanostructures with curved features
Source: Royal Society of Chemistry journal article supplement (doi:10.1039/d2cp00374k), 2022-01-01
Supplement: d2cp00374k1.pdf [file d2cp00374k1.pdf]

## Supporting Information

### Light modulation based on enhanced Kerr effect in molybdenum disulfide nanostructures with curved features

Tianlun Li,<sup>a</sup> Xiaodie Li,<sup>a</sup> Duorui Gao,<sup>b,c</sup> Jianyong Mao,<sup>a</sup> Yaping Hou,<sup>a</sup> Hui Chen,<sup>a</sup> Feng Li,<sup>a</sup> Yanpeng Zhang,<sup>a</sup> Jixiang Fang,<sup>a</sup> Lei Zhang<sup>\*a</sup>

<sup>a</sup>Key Laboratory of Physical Electronics and Devices of Ministry of Education & Shaanxi Key Laboratory of Information Photonic Technique, School of Electronic Science and Engineering, Xi'an Jiaotong University, Xi'an 710049, China.

<sup>b</sup>State Key Laboratory of Transient Optics and Photonics, Xi'an Institute of Optics and Precision Mechanics of CAS, Xi'an 710119, China.

<sup>c</sup>University of Chinese Academy of Sciences, Beijing 100049, China.

\*Email: eiezhanglei@xjtu.edu.cn

#### S.1. The emergence of the spatial self-phase modulation (SSPM) phenomenon

When a laser illuminates on the nonlinear optical medium, the refractive index will change with the intensity distribution. A local refractive-index change leads to a relevant phase-shift  $\Delta\varphi$  of laser beam after passing through the MoS<sub>2</sub> NP dispersions of thickness  $L_{eff}$ , which can be expressed as

$$\Delta\varphi(r) = \left(\frac{2\pi n_0}{\lambda}\right) \int_0^{L_{eff}} n_2 I(r,z) dz \quad (1)$$

where  $I(r,z)$  stands for the distribution of laser intensity,  $r \in [0, +\infty)$  is the transverse coordinate of the beam, and  $\lambda$  is the wavelength of applied laser in vacuum. The effective interaction length can be

$$L_{eff} = \int_{L_1}^{L_2} (1 + z^2/z_0^2)^{-1} dz = z_0 \arctan(z/z_0) \Big|_{L_1}^{L_2}$$

calculated by  $z_0 = \pi w_0^2/\lambda$ , where  $w_0$  defined by the  $1/e^2$  intensity diameter of laser beam  $\omega_0$  and wavelength of incident laser beam;  $L = L_2 - L_1$  equals to the thickness of quartz cuvette. In the experiment,  $L = 10$  mm and  $w_0 = 800$   $\mu\text{m}$  at the front surface of the cuvette. According to the Gaussian beam, the average laser intensity  $I$  is half of the central light intensity

$I(0,z)$ , and it can be assumed that  $\Delta\varphi(r) = \Delta\varphi_0 \exp(-2r^2/w_0^2)$  in the range of  $r \in [0, +\infty)$ . The

fields at the two coordinates  $r_1$  and  $r_2$  can interfere with each other when the satisfies the equation

$\left(\frac{d\Delta\varphi}{dr}\right)_{r=r_1} = \left(\frac{d\Delta\varphi}{dr}\right)_{r=r_2}$ . The bright or dark diffraction ring stripe appears when

$\Delta\varphi(r_1) - \Delta\varphi(r_2) = m\pi$ , where  $m$  equals an even or odd integer. When  $\Delta\varphi_0 \gg 2\pi$ , multiple diffraction

rings appear with the total number of rings  $N$  which can be bounded up with  $N = [\Delta\varphi(0) - \Delta\varphi(\infty)]/\Delta\varphi_0/2\pi$ . Although the total number of rings  $N$  is almost proportional to the applied optical field intensity,  $N$  does not increase indefinitely.

#### S.2. The preparation procedure of three-dimensional (3D) featured MoS<sub>2</sub> Nanoparticles (NPs)

Phosphomolybdic acid (PMA, H<sub>3</sub>PO<sub>4</sub>•12MoO<sub>3</sub>•nH<sub>2</sub>O, 99.9%) is purchased from Sigma Aldrich. Anhydrous ethanol (C<sub>2</sub>H<sub>5</sub>OH,  $\geq 95.0\%$ ), hydrofluoric acid (HF, 40%), sodium hydroxide (NaOH,  $\geq 96.0\%$ ) are purchased from Sinopharm Chemical Industry Co., Ltd. All chemicals are directly used without any

further purification.

The EP-FDU-12 silica template shows a unique mesostructure consisting of large mesopores and small wormlike mesopores. The structure of unique dual-mesoporous, which have a lot of highly interconnected pore channels, could enhance the mobility of precursors and create nanobridges between particles during nanocasting process. In addition, the morphologies and structures of the obtained products can be controlled by the filling amount of precursor, interior surface feature of silica template and reaction conditions. As illustrated in Fig. S1, the precursor PMA has been filled from the interior of the nanoparticle templates, which leads to a less apparent and uncontrollable mesoporous structure. The filling amount of PMA precursor is the most important factor on the final structures of MoS<sub>2</sub> products. With the increase of PMA concentration from 5 mM to 30 mM, the obtained morphologies of MoS<sub>2</sub> nanostructures could be changed from multilayered MoS<sub>2</sub> half-sphere to MoS<sub>2</sub> sphere, yet, both of the nanostructure have the curved surface.

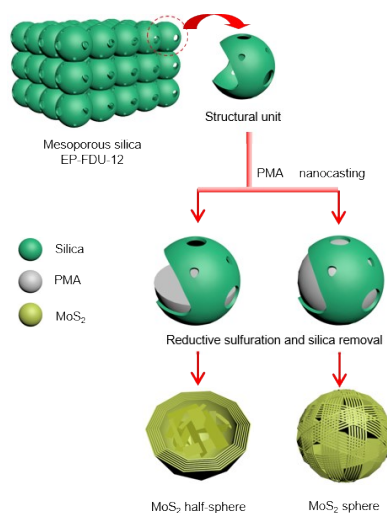

Fig. S1 The schematic of the fabrication process of 3D MoS<sub>2</sub> NPs *via* template method using EP-FDU-12 mesoporous silica as the hard template.
